# Supplementary material
Source: PubMed Central journal article supplement (PMC7072000)
Supplement: NIHMS1557468-supplement-Supplementary_Table_1.pdf [file NIHMS1557468-supplement-Supplementary_Table_1.pdf]

**Supplementary Table 1.** Clinical and demographic data of the Philadelphia Cohort.

| Patient ID | Age (years) | Gender | Race             | Pre-ATI viral load (copies/ml) | Pre-ATI CD4 count (cells/mm <sup>3</sup> ) | Pre-ATI CD4% | ART regimen                                            | Time to viral rebound (days) | Post-ATI viral setpoint (copies/ml) |
|------------|-------------|--------|------------------|--------------------------------|--------------------------------------------|--------------|--------------------------------------------------------|------------------------------|-------------------------------------|
| S-8        | 53          | Male   | Caucasian        | <50                            | 426                                        | 23.7         | indinavir, lamivudine/zidovudine                       | 14                           | NA                                  |
| S-14       | 29          | Male   | Caucasian        | <50                            | 782                                        | 46           | stavudine, lamivudine, efavirenz                       | 28                           | 16153                               |
| S-20       | 23          | Male   | African American | <50                            | 708                                        | 37.3         | efavirenz, lamivudine/zidovudine                       | 28                           | 3961                                |
| S-21       | 40          | Male   | Caucasian        | <50                            | 509                                        | 28.3         | indinavir, stavudine, lamivudine                       | 14                           | 31674                               |
| S-25       | 36          | Female | African American | <50                            | 886                                        | 40.3         | efavirenz, lamivudine, stavudine                       | 70                           | 2693                                |
| S-28       | 48          | Male   | Hispanic         | <50                            | 478                                        | 47.8         | efavirenz, lamivudine/zidovudine                       | 28                           | 274                                 |
| S-29       | 45          | Male   | African American | <50                            | 513                                        | 15.1         | nevirapine, lamivudine, stavudine                      | 28                           | NA                                  |
| S-30       | 45          | Male   | Caucasian        | <50                            | 602                                        | 24.1         | abacavir, lamivudine, stavudine, efavirenz             | 14                           | NA                                  |
| S-31       | 45          | Male   | Caucasian        | <50                            | 712                                        | 28.5         | efavirenz, lamivudine, stavudine                       | 27                           | 6775                                |
| S-32       | 41          | Male   | Caucasian        | <50                            | 864                                        | 37.6         | efavirenz, stavudine, lamivudine                       | 35                           | 21961                               |
| S-33       | 49          | Female | African American | <50                            | 901                                        | 39.2         | indinavir, nevirapine                                  | 15                           | NA                                  |
| S-35       | 51          | Male   | Caucasian        | <50                            | 516                                        | 21.5         | efavirenz, abacavir, lopinavir/ritonavir               | 14                           | 7260                                |
| S-36       | 40          | Male   | Caucasian        | <50                            | 517                                        | 39.8         | efavirenz, lamivudine, stavudine                       | 35                           | NA                                  |
| S-38       | 42          | Male   | Caucasian        | <50                            | 688                                        | 32.8         | abacavir, nevirapine, lamivudine                       | 21                           | 8460                                |
| S-41       | 54          | Male   | Caucasian        | <50                            | 766                                        | 36.5         | efavirenz, abacavir, lamivudine                        | 28                           | 21246                               |
| S-42       | 42          | Male   | Caucasian        | <50                            | 734                                        | 36.7         | lopinavir/ritonavir, abacavir, lamivudine              | 14                           | NA                                  |
| S-43       | 50          | Male   | Caucasian        | <50                            | 690                                        | 23.8         | didanosine, stavudine, efavirenz                       | 28                           | 13675                               |
| S-44       | 44          | Male   | Caucasian        | <50                            | 374                                        | 18.7         | indinavir, didanosine, lamivudine                      | 14                           | 81949                               |
| S-49       | 54          | Male   | African American | <50                            | 557                                        | 42.9         | efavirenz, lamivudine/zidovudine                       | 119                          | NA                                  |
| S-51       | 53          | Male   | Caucasian        | <50                            | 434                                        | 36.2         | nelfinavir, lamivudine, stavudine                      | 14                           | 1297                                |
| S-54       | 43          | Male   | Caucasian        | <50                            | 832                                        | 34.7         | ritonavir, indinavir, lamivudine, nevirapine, abacavir | 14                           | 21456                               |
| S-55       | 38          | Male   | African American | <50                            | 615                                        | 32.4         | stavudine, lamivudine, abacavir                        | 42                           | NA                                  |
| S-60       | 51          | Male   | Caucasian        | <50                            | 669                                        | 39.4         | efavirenz, stavudine, lamivudine                       | 21                           | 16249                               |
| S-62       | 48          | Male   | African American | <50                            | 720                                        | 42.4         | stavudine, efavirenz, lamivudine                       | 42                           | 6423                                |
