# Supplementary material
Source: PubMed Central journal article supplement (PMC7072000)
Supplement: NIHMS1557468-supplement-Supplementary_Table_2.pdf [file NIHMS1557468-supplement-Supplementary_Table_2.pdf]

**Supplementary Table 2.** Clinical and demographic data of the Johannesburg Cohort.

| <b>Patient ID</b> | <b>Age (years)</b> | <b>Gender</b> | <b>Race</b>   | <b>Pre-ATI viral load (copies/ml)</b> | <b>ART regimen</b>                         | <b>Post-ATI viral load (copies/ml)</b> |
|-------------------|--------------------|---------------|---------------|---------------------------------------|--------------------------------------------|----------------------------------------|
| CS1002            | 29                 | Female        | Black African | <50                                   | Stavudine, lamivudine, lopinavir/ritonavir | 13200                                  |
| CS1014            | 36                 | Female        | Black African | <50                                   | Stavudine, lamivudine, lopinavir/ritonavir | 571                                    |
| CS1028            | 42                 | Female        | Black African | <50                                   | Stavudine, lamivudine, lopinavir/ritonavir | 2970                                   |
| CS1037            | 37                 | Female        | Black African | <50                                   | Stavudine, lamivudine, lopinavir/ritonavir | 84                                     |
| CS1042            | 34                 | Female        | Black African | <50                                   | Stavudine, lamivudine, lopinavir/ritonavir | 27200                                  |
| CS1053            | 28                 | Male          | Black African | <50                                   | Stavudine, lamivudine, lopinavir/ritonavir | 890                                    |
| CS1064            | 37                 | Female        | Black African | <50                                   | Stavudine, lamivudine, lopinavir/ritonavir | 83                                     |
| CS1069            | 37                 | Male          | Black African | <50                                   | Stavudine, lamivudine, lopinavir/ritonavir | 1680                                   |
| CS1073            | 48                 | Male          | Black African | <50                                   | Stavudine, lamivudine, lopinavir/ritonavir | 33000                                  |
| CS1077            | 43                 | Female        | Black African | <50                                   | Stavudine, lamivudine, lopinavir/ritonavir | 918                                    |
| CS1101            | 44                 | Female        | Black African | <50                                   | Stavudine, lamivudine, lopinavir/ritonavir | 96                                     |
| CS1109            | 32                 | Female        | Black African | <50                                   | Stavudine, lamivudine, lopinavir/ritonavir | <50                                    |
| CS1112            | 41                 | Male          | Black African | <50                                   | Stavudine, lamivudine, lopinavir/ritonavir | 1270                                   |
| CS1122            | 58                 | Male          | Black African | <50                                   | Stavudine, lamivudine, lopinavir/ritonavir | <50                                    |
| CS1125            | 42                 | Female        | Black African | <50                                   | Stavudine, lamivudine, lopinavir/ritonavir | <50                                    |
| CS1130            | 29                 | Female        | Black African | <50                                   | Stavudine, lamivudine, lopinavir/ritonavir | 216                                    |
| CS1166            | 21                 | Female        | Black African | <50                                   | Stavudine, lamivudine, lopinavir/ritonavir | 46400                                  |
| CS1167            | 24                 | Female        | Black African | <50                                   | Stavudine, lamivudine, lopinavir/ritonavir | 4950                                   |
| CS1176            | 37                 | Male          | Black African | <50                                   | Stavudine, lamivudine, lopinavir/ritonavir | 65200                                  |
| CS1185            | 44                 | Female        | Black African | <50                                   | Stavudine, lamivudine, lopinavir/ritonavir | 414                                    |
| CS1193            | 30                 | Female        | Black African | <50                                   | Stavudine, lamivudine, lopinavir/ritonavir | <50                                    |
| CS1194            | 33                 | Female        | Black African | <50                                   | Stavudine, lamivudine, lopinavir/ritonavir | 713                                    |
| CS1203            | 44                 | Male          | Black African | <50                                   | Stavudine, lamivudine, lopinavir/ritonavir | 4230                                   |
