# Supplementary material
Source: PubMed Central journal article supplement (PMC7072000)
Supplement: NIHMS1557468-supplement-Supplementary_Table_4.pdf [file NIHMS1557468-supplement-Supplementary_Table_4.pdf]

## Philadelphia Cohort

**Supplementary Table 4.** List of pre-ATI plasma glycomic signatures predicted post-ATI viral setpoints

| Source | Lectin  | Glycan Specificity                                     | N  | Correlation Coefficient | <i>p</i> value | Normality | Test           |
|--------|---------|--------------------------------------------------------|----|-------------------------|----------------|-----------|----------------|
| Plasma | ACA     | Gal $\beta$ 1-3GalNAc (T antigen)                      | 16 | 0.755                   | 0.0007         | yes       | Pearson's r    |
| Plasma | ABA     | Gal $\beta$ 1-3GalNAc (T antigen), GlcNAc              | 16 | 0.714                   | 0.002          | yes       | Pearson's r    |
| Plasma | Jacalin | Gal $\beta$ 1-3GalNAc (T antigen), GalNAc (Tn antigen) | 16 | 0.626                   | 0.009          | yes       | Pearson's r    |
| Plasma | MPA     | Gal $\beta$ 1-3GalNAc (T antigen), GalNAc (Tn antigen) | 16 | 0.597                   | 0.015          | yes       | Pearson's r    |
| Plasma | TxLCl   | Galactosylated N-glycans up to triantenna              | 16 | 0.556                   | 0.028          | no        | Spearman's rho |
| Plasma | ECA     | $\beta$ Galactose                                      | 16 | 0.646                   | 0.007          | yes       | Pearson's r    |
| Plasma | RCA120  | $\beta$ Galactose                                      | 16 | 0.555                   | 0.026          | yes       | Pearson's r    |
| Plasma | LEL     | Polylactosamine, (GlcNAc) <sub>n</sub>                 | 16 | -0.585                  | 0.017          | yes       | Pearson's r    |
