# Supplementary material
Source: PubMed Central journal article supplement (PMC7072000)

# Supplementary Figure 1

## A Philadelphia Cohort

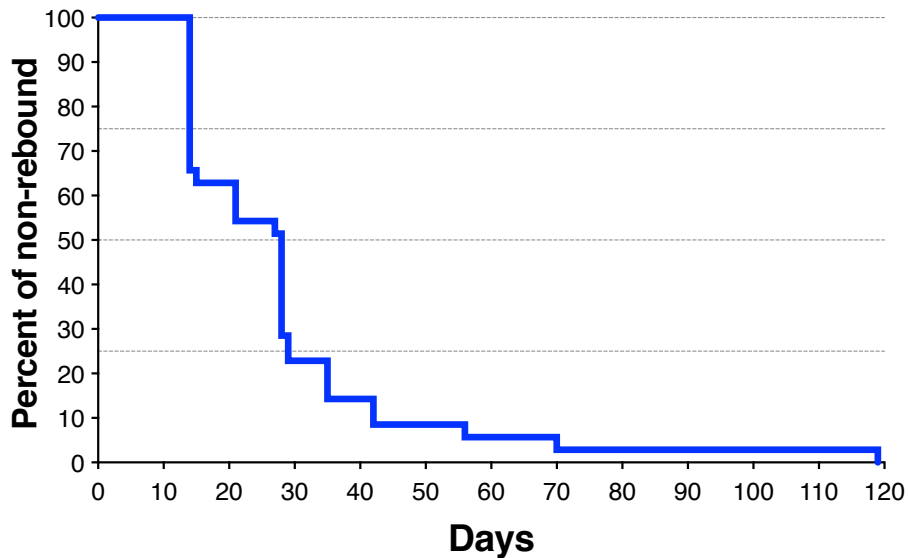

## B Philadelphia Cohort

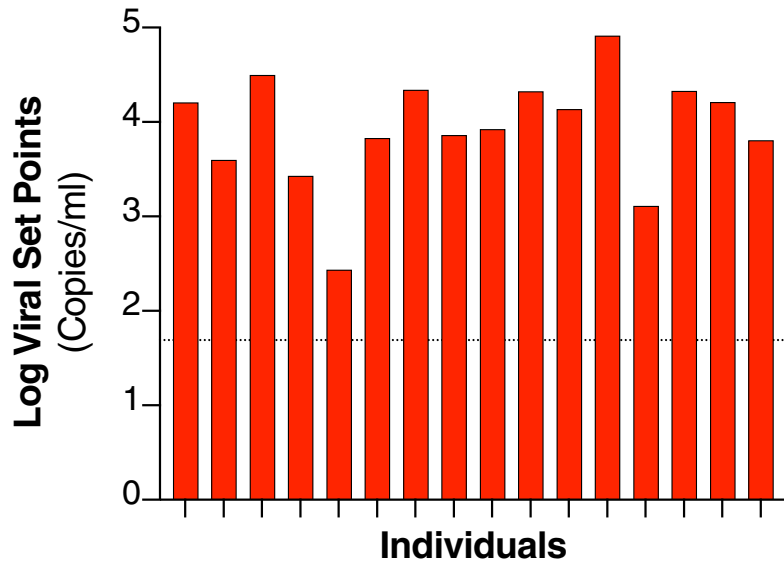

Supplement: NIHMS1557468-supplement-Supplementary_Figure_1.pdf [file NIHMS1557468-supplement-Supplementary_Figure_1.pdf]

# Supplementary Figure 2

## Johannesburg Validation Cohort

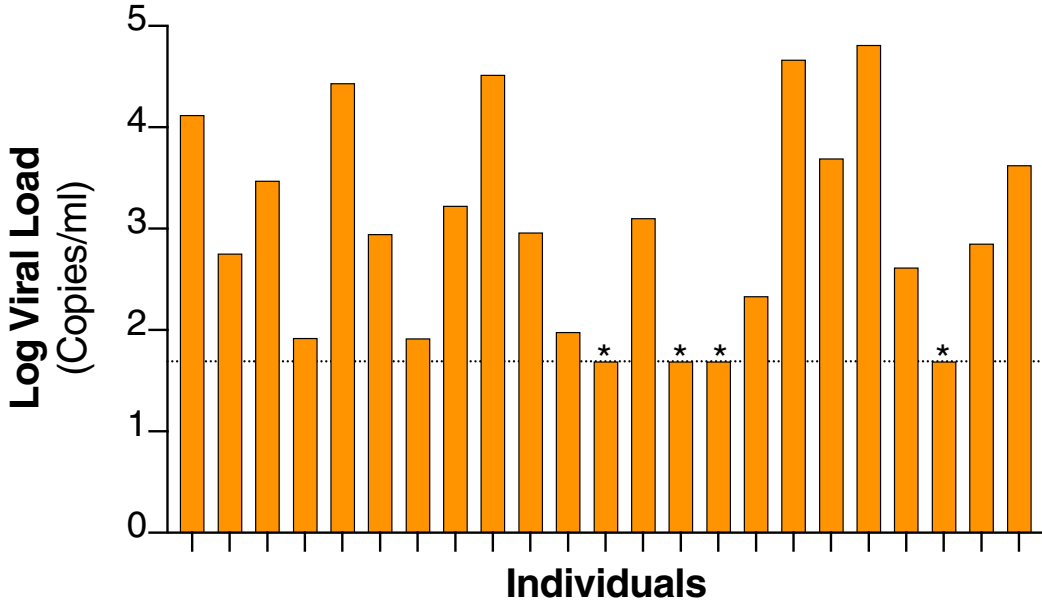

\*Below Limit of detection (50 copies/ml)

Supplement: NIHMS1557468-supplement-Supplementary_Figure_2.pdf [file NIHMS1557468-supplement-Supplementary_Figure_2.pdf]

# Supplementary Figure 5

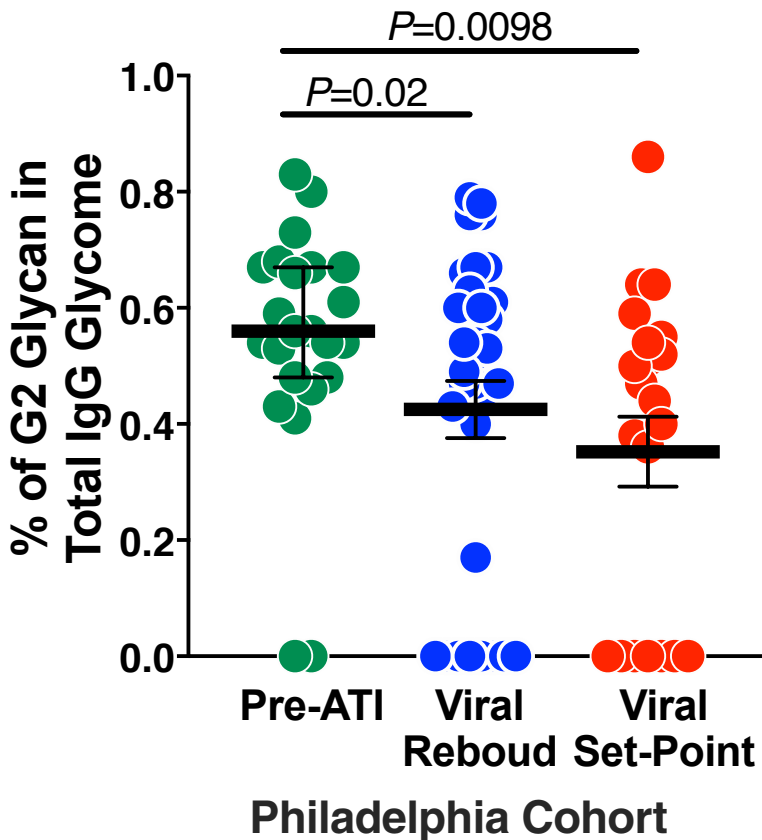

Supplement: NIHMS1557468-supplement-Supplementary_Figure_5.pdf [file NIHMS1557468-supplement-Supplementary_Figure_5.pdf]
